# Supplementary material for: Constitutive expression of NF-κB inducing kinase in regulatory T cells impairs suppressive function and promotes instability and pro-inflammatory cytokine production
Source: PubMed Central journal article supplement (PMC5677020; doi:10.1038/s41598-017-14965-x), 2017-11-07
Supplement: 41598_2017_14965_MOESM1_ESM.pdf [file 41598_2017_14965_MOESM1_ESM.pdf]

Title:

Constitutive expression of NF- $\kappa$ B inducing kinase in regulatory T cells impairs suppressive function and promotes instability and pro-inflammatory cytokine production

Authors:

Fanny Polesso<sup>1†</sup>, Minhazur Sarker<sup>1†</sup>, Arian Anderson<sup>1</sup>, David C. Parker<sup>1</sup>, and Susan E. Murray<sup>1,2,\*</sup>

<sup>1</sup>Department of Molecular Microbiology and Immunology, Oregon Health & Science University, Portland, OR 97239

<sup>2</sup>Department of Biology, University of Portland, Portland, OR

<sup>†</sup>Contributed equally to this work

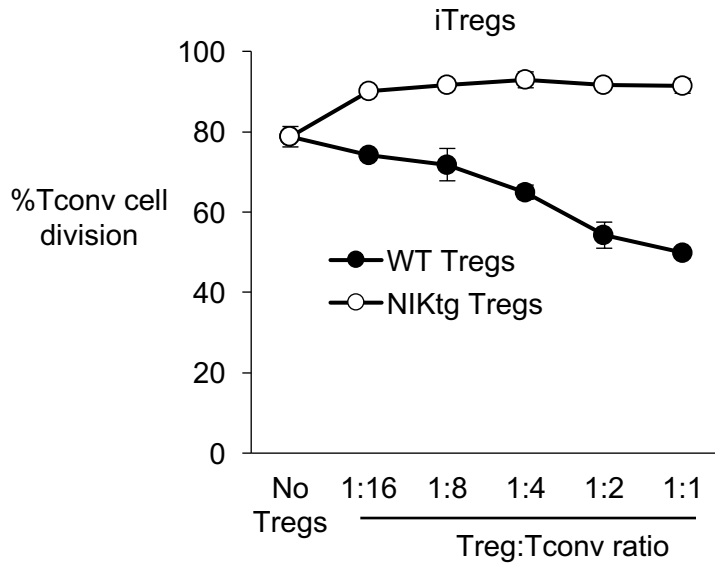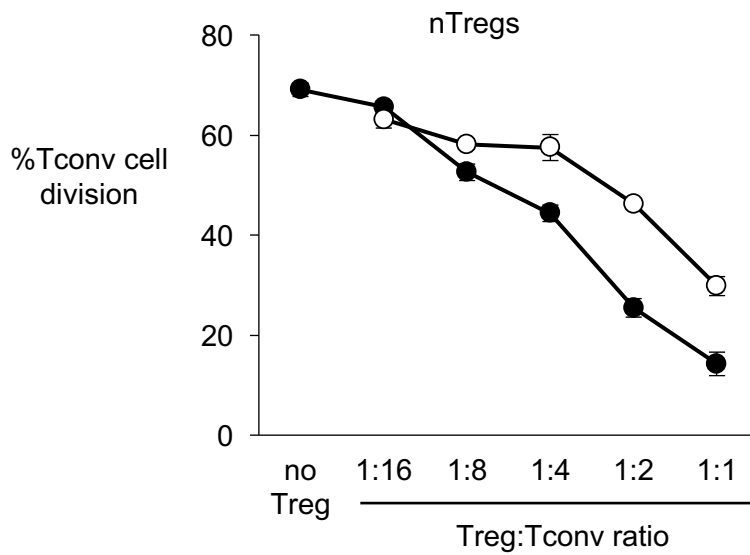

**Supplementary Fig. S1.** This figure shows repeat data for the experiments shown in Fig. 1, a-d. Top, inhibition of WT Tconv cell proliferation by WT vs. NIKtg iTregs. Bottom, inhibition of WT Tconv cell proliferation by WT vs. NIKtg nTregs.

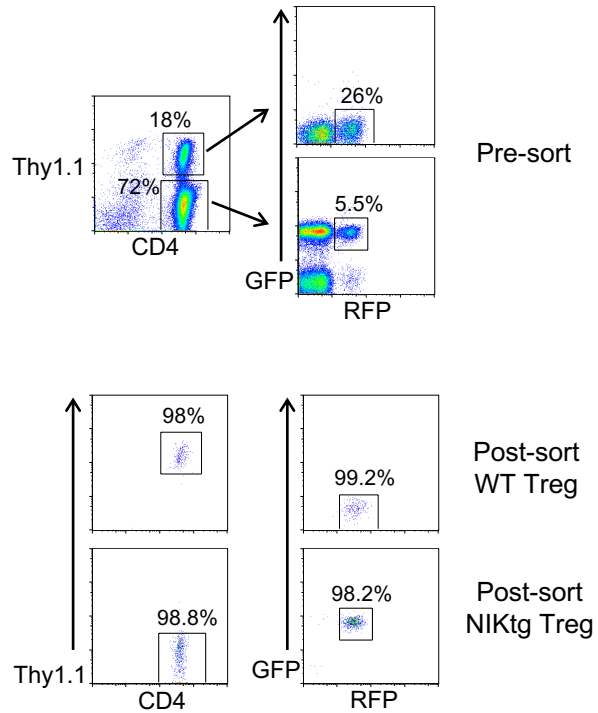

**Supplementary Figure S2.** Sort purity for NIKtg and WT Tregs from mixed bone marrow chimeras. CD4 T cells were magnetically enriched from NIKtg/CD4-Cre/Foxp3<sup>RFP</sup> + WT/Thy1.1/Foxp3<sup>RFP</sup> mixed chimeric spleens and then FACS-sorted on the basis of Thy1.1, CD4, RFP and GFP (NIK transgene expressed).

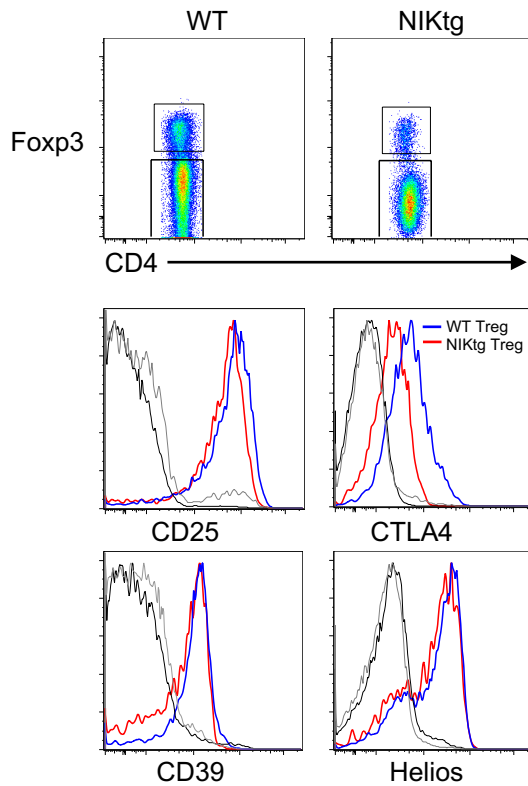

**Supplementary Figure S3.** NIKtg Tregs are Foxp3<sup>+</sup> and express other Treg markers. Top, Foxp3 expression on CD4 gated NIKtg and WT splenocytes from mixed BM chimeras created by reconstituting lethally irradiated mice with a 50:50 mix of CD4<sup>Cre</sup>xNIKtg BM and congenically marked WT BM. Middle and bottom, expression of the indicated Treg markers on WT (blue) and NIKtg (red) Foxp3<sup>+</sup> Tregs gated as shown in the top panels. Expression of these markers on WT (black) and NIKtg (gray) Tconv is shown for comparison.

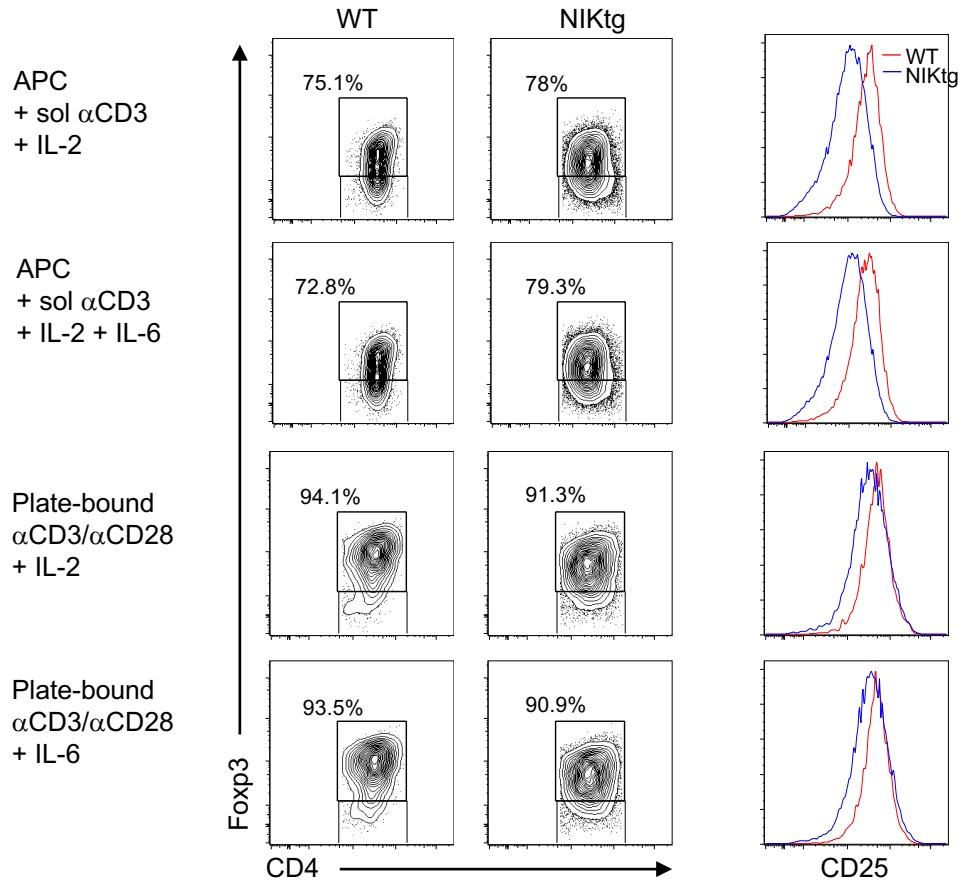

**Supplementary Figure S4.** NIKtg and WT nTregs display equally stable Foxp3 expression during short term in vitro culture, but NIKtg Tregs have decreased CD25 expression. WT and NIKtg Foxp3<sup>RFP+</sup> Tregs were sorted from spleens of mixed BM chimeras created by reconstituting lethally irradiated mice with a 50:50 mix of CD4<sup>Cre</sup>NIKtg BM and congenically marked WT BM. They were then cultured under the conditions indicated above, and assessed for Foxp3 and CD25 expression 6 days later. APC, antigen presenting cells, which consisted of congenically labeled WT splenocytes irradiated with 10 Gy. Soluble αCD3 was used at 5ug/ml. Plate-bound αCD3 and αCD28 were coated at 5ug/ml and 2ug/ml, respectively. IL-2 and IL-6 were used at 100U/ml and 20ng/ml, respectively.

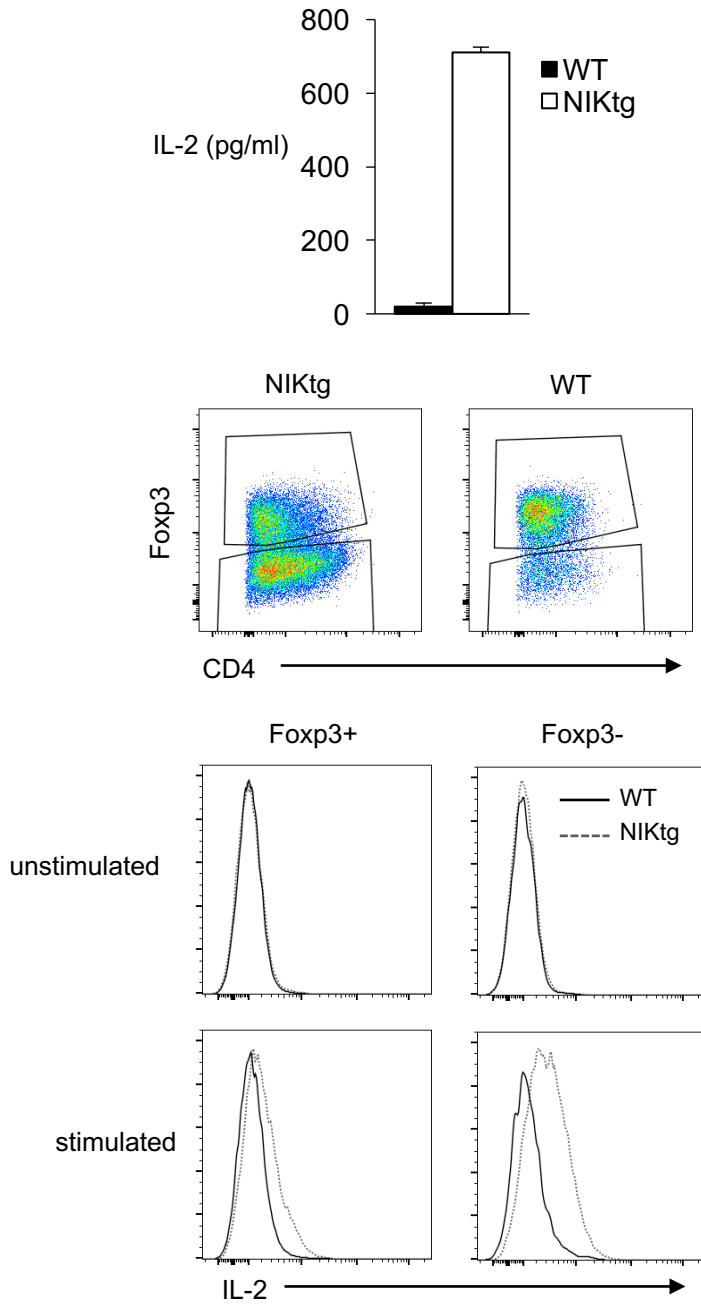

**Supplementary Figure S5.** This figure shows repeat data for the experiments shown in Fig. 5, e-f. NIKtg and WT T cells were differentiated under iTreg inducing conditions, sorted on the basis of Foxp3-RFP, then recultured for an additional 3 days in the absence of exogenous IL-2. Top, IL-2 concentration in secondary culture supernatants. Middle and bottom, Foxp3 expression and intracellular IL-2 production by Foxp3<sup>+</sup> and Foxp3<sup>-</sup> T cells upon PMA + ionomycin stimulation after secondary culture.

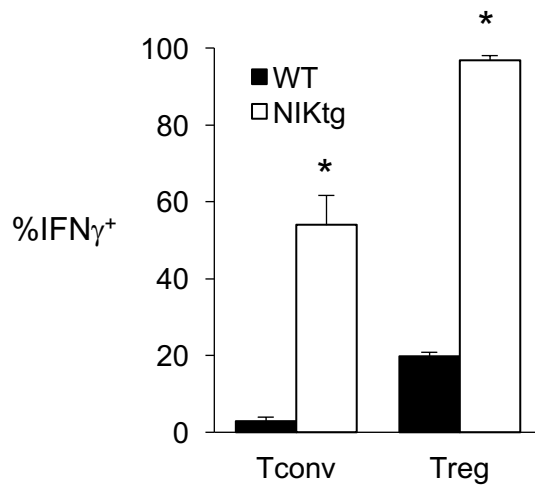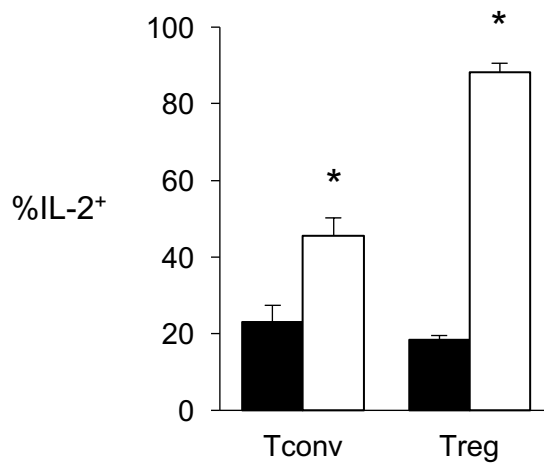

**Supplementary Figure S6.** This figure shows repeat data for the experiments shown in Fig. 6. NIKtg and WT CD4<sup>+</sup>Foxp3<sup>+</sup> Treg and CD4<sup>+</sup>Foxp3<sup>-</sup> Tconv from mixed BM chimeras were assessed for IFN $\gamma$  and IL-2 production by intracellular cytokine staining upon PMA plus ionomycin stimulation.

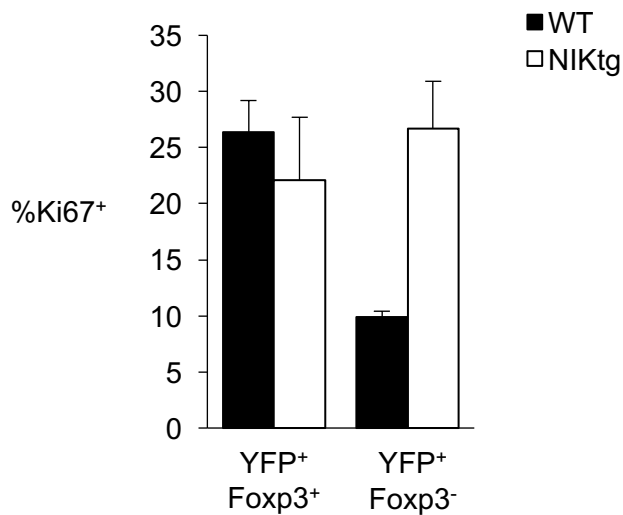

**Supplementary Figure S7.** This figure shows repeat data for the experiment shown in Fig. 8a-b. Splenocytes from NIKtg/Foxp3<sup>Cre</sup>/R26<sup>YFP</sup> and WT/Foxp3<sup>Cre</sup>/R26<sup>YFP</sup> littermates were gated on Tregs (CD4<sup>+</sup>YFP<sup>+</sup>Foxp3<sup>+</sup>) or ex-Foxp3<sup>+</sup> T cells (CD4<sup>+</sup>YFP<sup>+</sup>Foxp3<sup>-</sup>) and assessed for Ki67 expression by intracellular flow cytometric staining.
